# Supplementary material
Source: Springer Nature journal article supplement (https://www.springermedizin.de/resource/supplementary/12889_2006_460_MOESM1_ESM.pdf/9500918)

Randomised selection from 4 GP registers  
(N=400)  
Signed invitation letter from GP and RCT  
information leaflet

Consented to participate in RCT  
(N=126)

RCT baseline interview at which written  
consent to participate in qualitative study  
obtained (N=96)

Randomisation

Control  
(Welfare rights interview)

Qualitative interview  
(N=11)  
(Average 5 months after  
welfare rights screening)

Intervention  
(Welfare rights interview)

Qualitative interview  
(N=14)  
(Average 10 months after  
welfare rights screening)

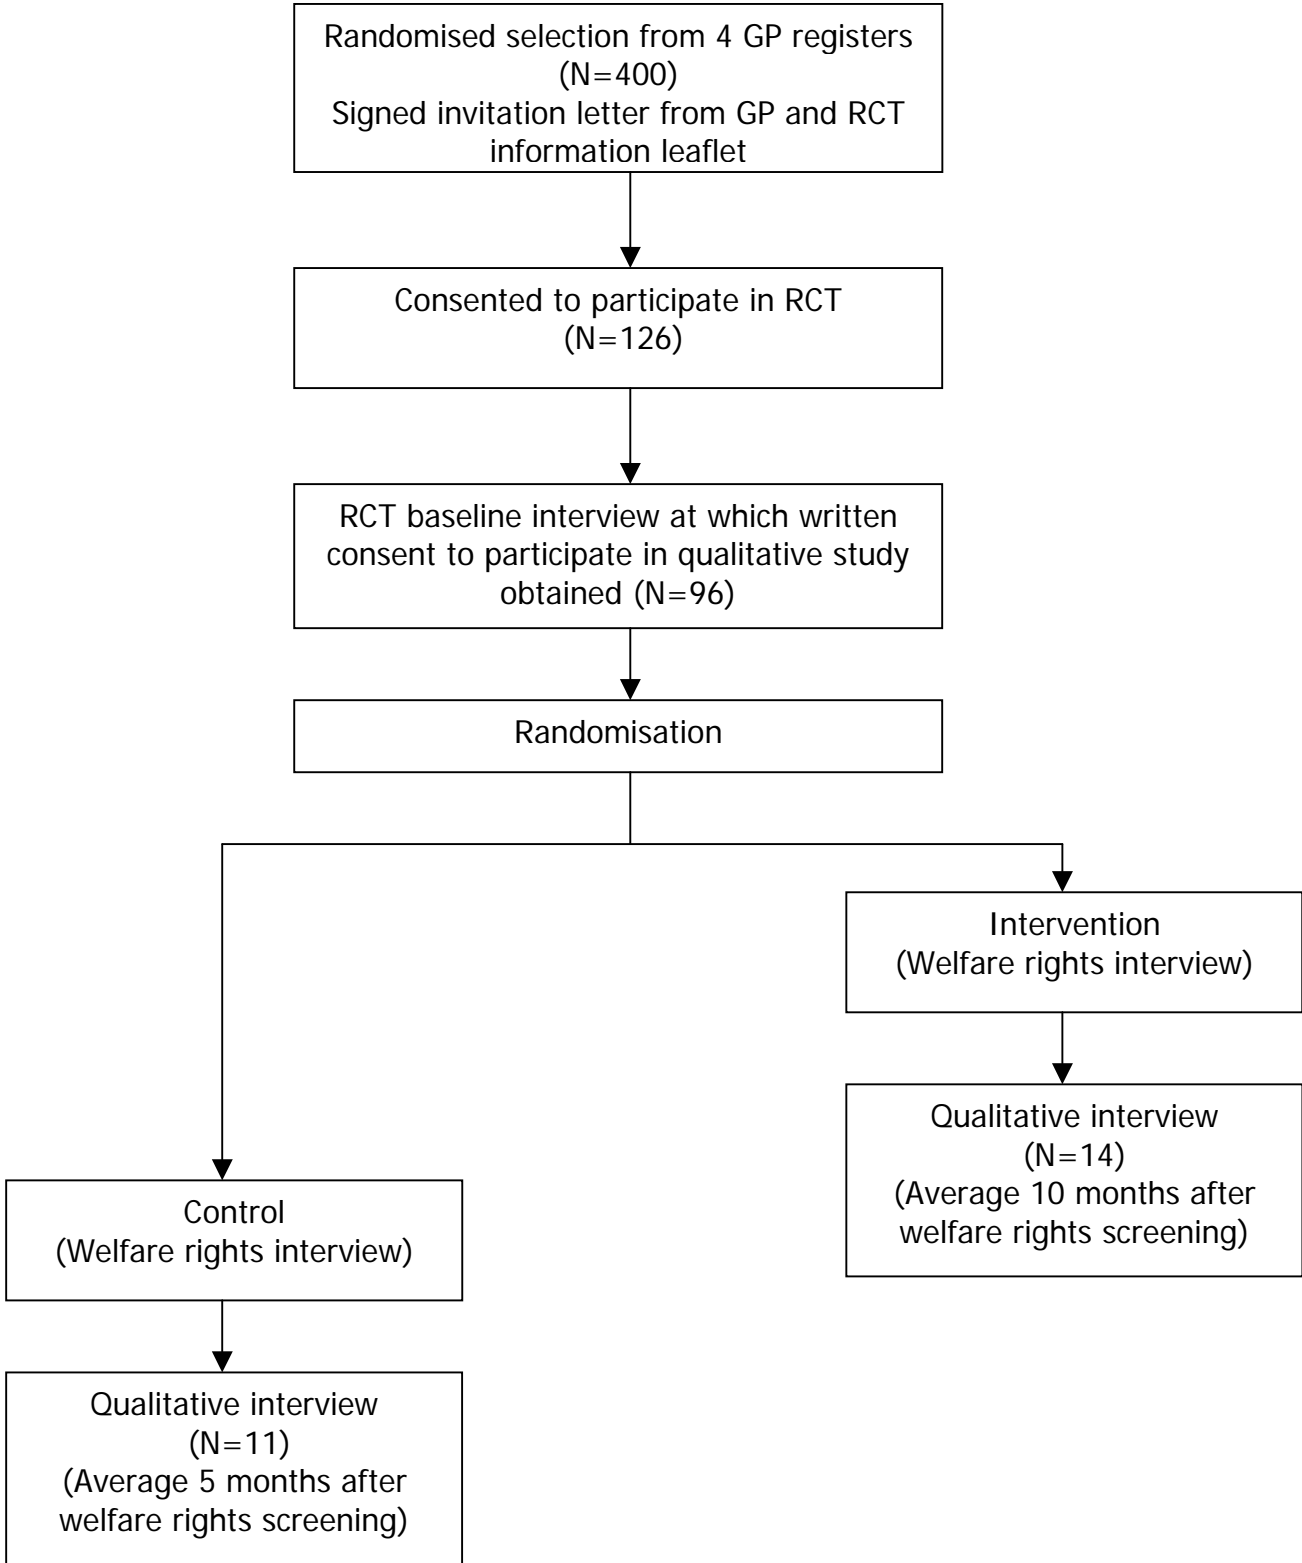

Supplement: MOESM1 [file 9500918]
